# Supplementary material
Source: PubMed Central journal article supplement (PMC2647558)

**Figure S1** - A comparison of observed CPL behavior for the [EuR(+)BnMeH22IAM]<sup>-</sup> complex (10<sup>-3</sup> M) with MeOH (top graph) or DMF (lower graph) as solvent. The lower curves in each graph are the observed total luminescence while the upper curves are the observed CPL spectra.

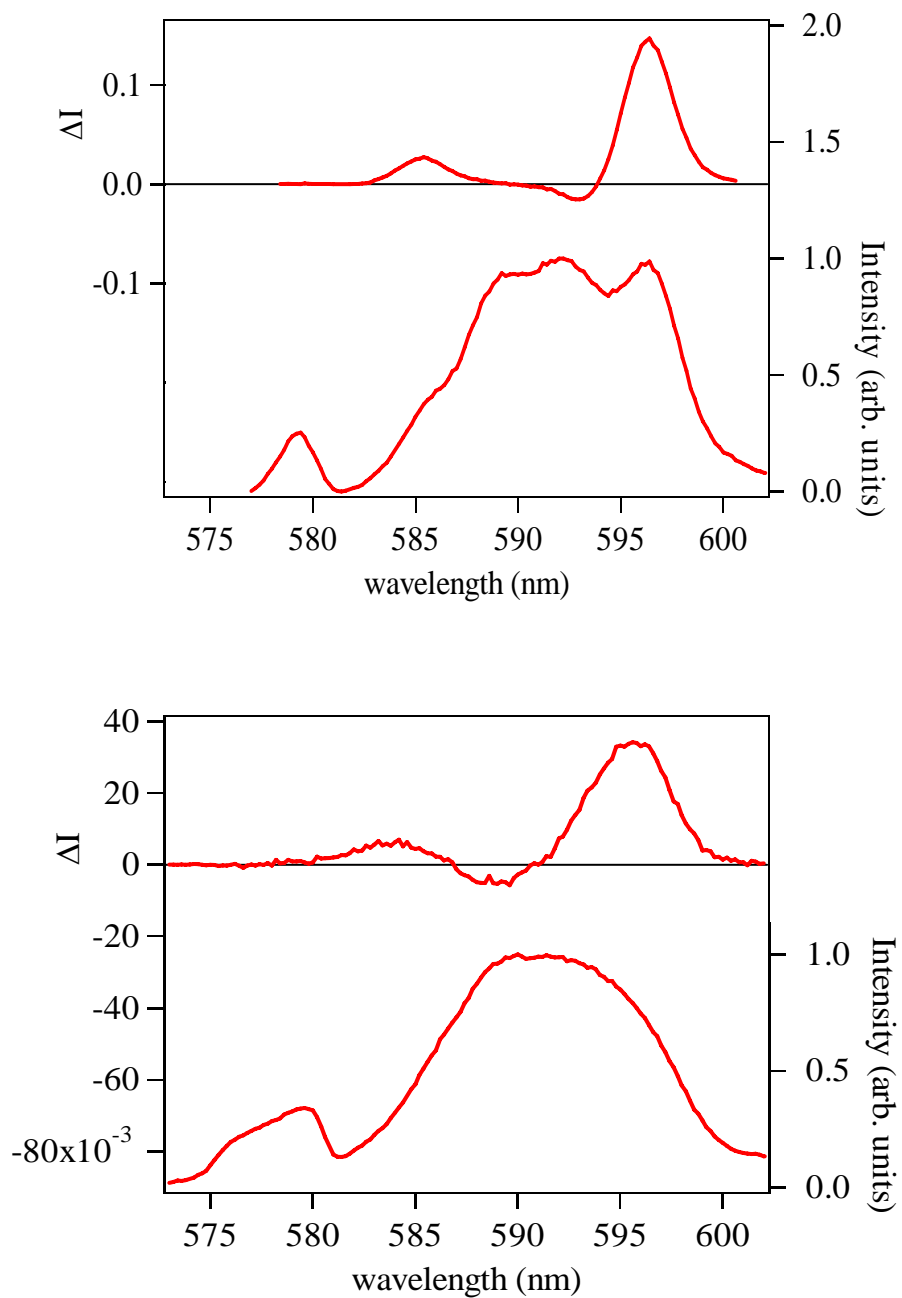

Supplement: NIHMS86983-supplement-Arrays.pdf [file NIHMS86983-supplement-Arrays.pdf]
